# Supplementary material for: An AgPd NP-based lateral flow immunoassay for simultaneous detection of glycocholic acid and alpha-fetoprotein
Source: Royal Society of Chemistry journal article supplement (doi:10.1039/d3ay02286b), 2024-01-01
Supplement: d3ay02286b5.pdf [file d3ay02286b5.pdf]

**Table. S1** Optimization results of experimental parameters of the AgPd NPs-based LFIA: concentration specific value of CL, TL1 and TL2.

| Number | CL        | TL1     | TL2       |
|--------|-----------|---------|-----------|
| 1      | 0.5 mg/mL | 1 mg/mL | -         |
| 2      | 0.5 mg/mL | 2 mg/mL | -         |
| 3      | 0.5 mg/mL | 4 mg/mL | -         |
| 4      | 1 mg/mL   | 1 mg/mL | -         |
| 5      | 1 mg/mL   | 2 mg/mL | -         |
| 6      | 1 mg/mL   | 4 mg/mL | -         |
| 7      | 2 mg/mL   | 1 mg/mL | -         |
| 8      | 2 mg/mL   | 2 mg/mL | -         |
| 9      | 2 mg/mL   | 4 mg/mL | -         |
| 10     | 0.5 mg/mL | -       | 0.4 mg/mL |
| 11     | 0.5 mg/mL | -       | 0.6 mg/mL |
| 12     | 0.5 mg/mL | -       | 0.8 mg/mL |
| 13     | 1 mg/mL   | -       | 0.4 mg/mL |
| 14     | 1 mg/mL   | -       | 0.6 mg/mL |
| 15     | 1 mg/mL   | -       | 0.8 mg/mL |
| 16     | 2 mg/mL   | -       | 0.4 mg/mL |
| 17     | 2 mg/mL   | -       | 0.6 mg/mL |
| 18     | 2 mg/mL   | -       | 0.8 mg/mL |
