# Supplementary figures and images for: An AgPd NP-based lateral flow immunoassay for simultaneous detection of glycocholic acid and alpha-fetoprotein
Source: Royal Society of Chemistry journal article supplement (doi:10.1039/d3ay02286b), 2024-01-01

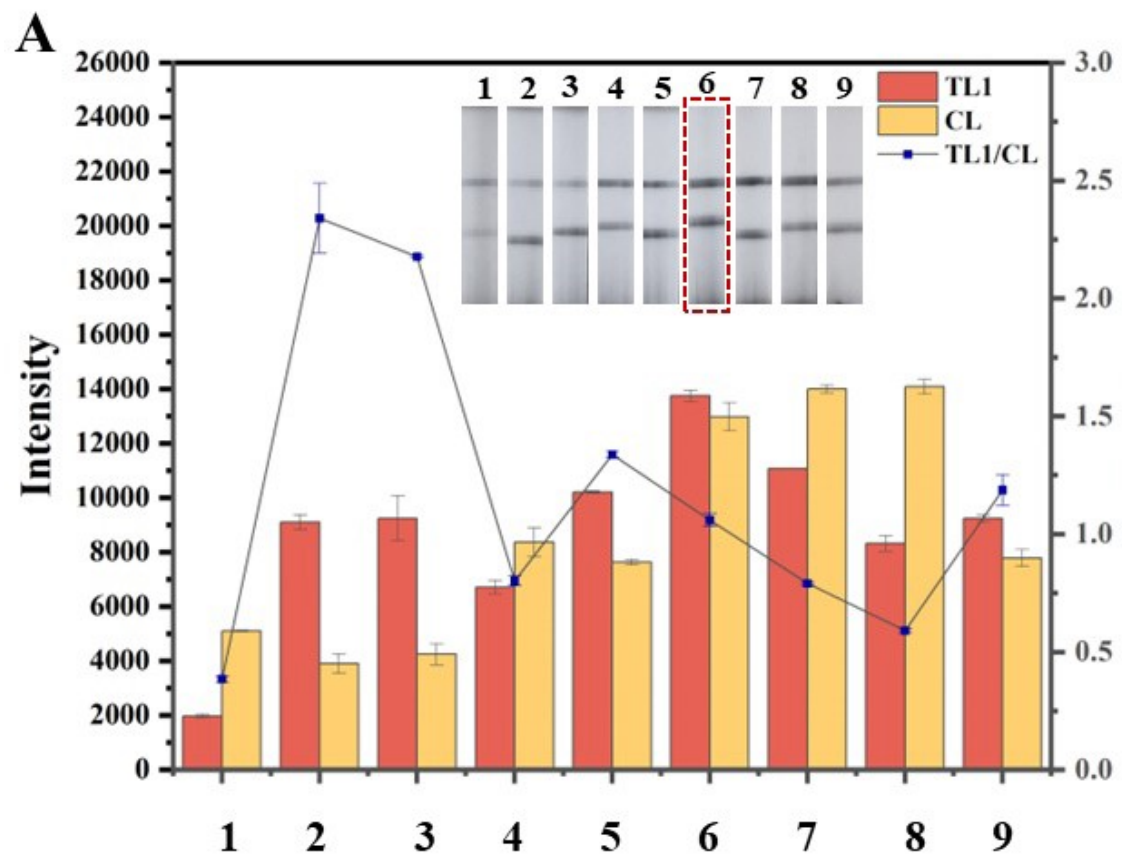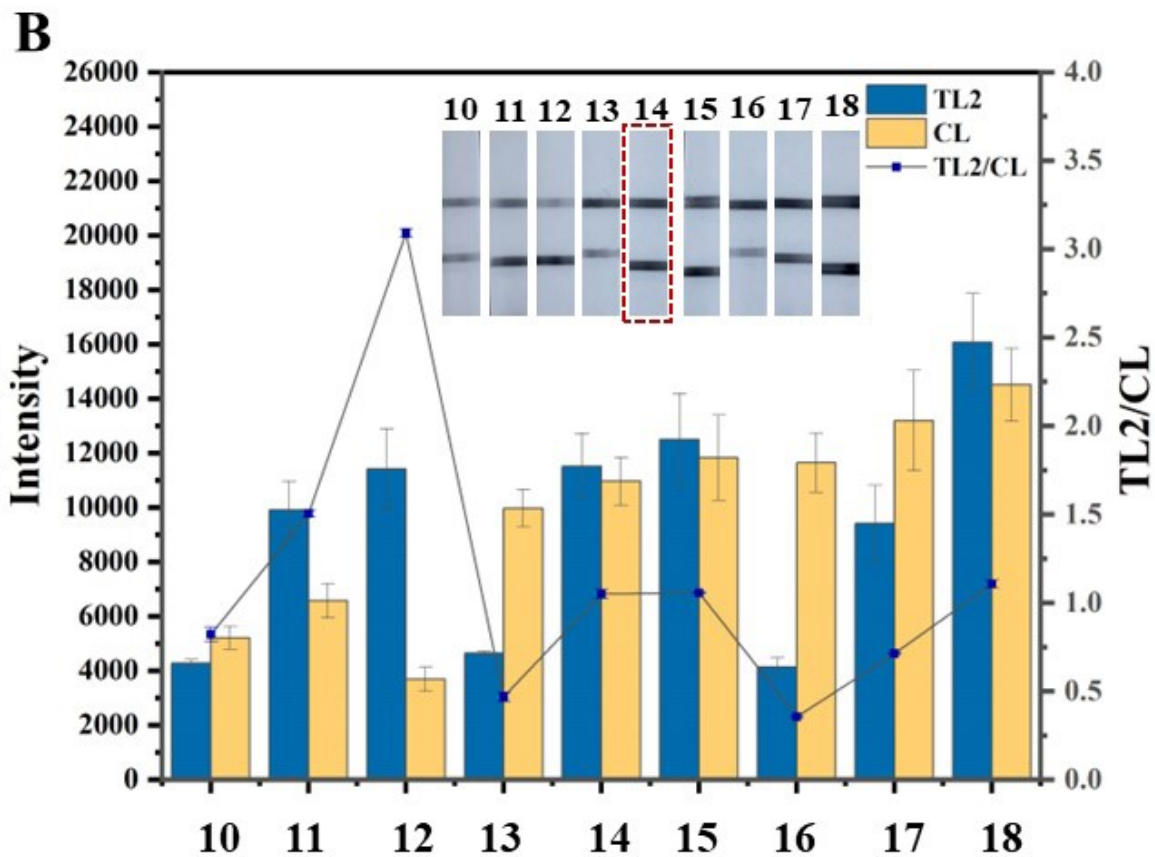

Supplement: d3ay02286b3.pdf [file d3ay02286b3.pdf]

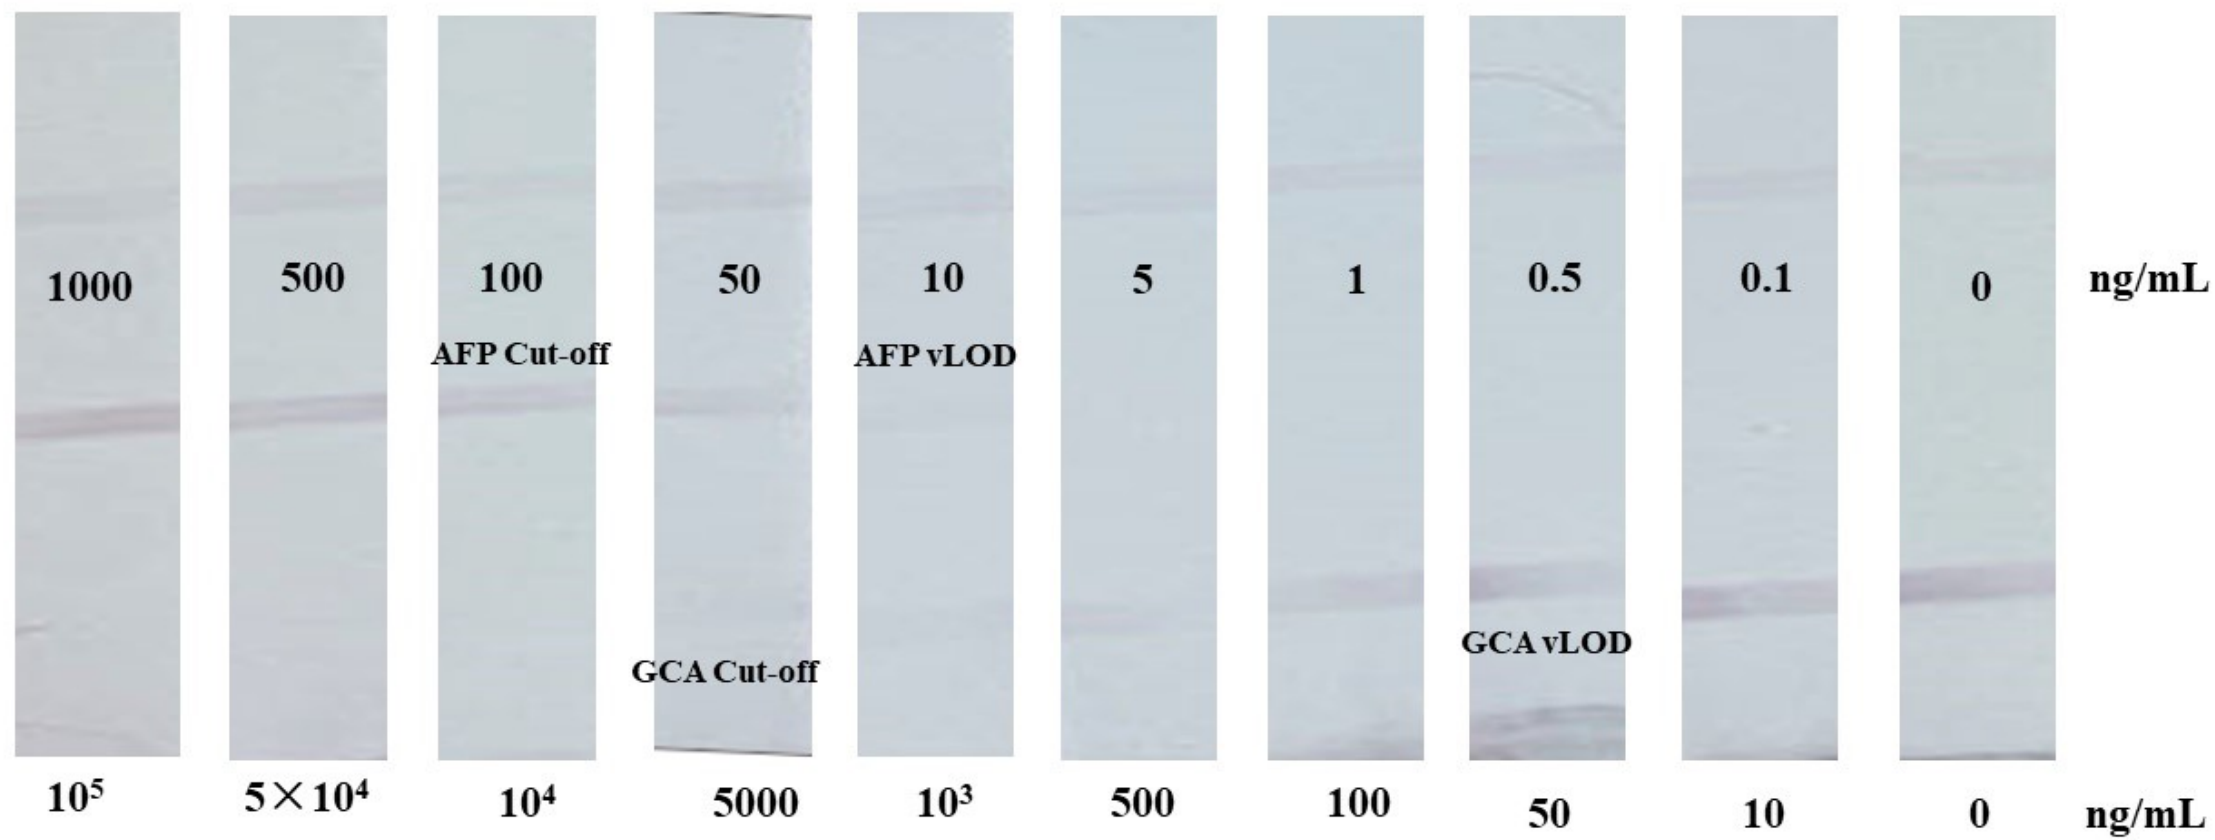

Supplement: d3ay02286b4.pdf [file d3ay02286b4.pdf]
